# Supplementary material for: Synthesis and growth mechanism of triangular Ag-rich AgAu alloy prisms in an aqueous solution in the presence of PVP, citrate and H2O2
Source: Royal Society of Chemistry journal article supplement (doi:10.1039/c3ce41172a), 2013-01-01
Supplement: c3ce41172a.pdf [file c3ce41172a.pdf]

## Electronic supplementary information

Synthesis and growth mechanism of triangular Ag-rich AgAu alloy prisms  
in an aqueous solution in the presence of PVP, citrate and H<sub>2</sub>O<sub>2</sub>

Masaharu Tsuji,<sup>\* a,b,c</sup> Atsushi Yajima,<sup>b</sup> Mika Hamasaki,<sup>d</sup> Masashi Hattori<sup>a</sup>,  
Masahito Mitarai<sup>e</sup> and Hirofumi Kawazumi<sup>d</sup>

<sup>a</sup> *Institute for Materials Chemistry and Engineering, Kyushu University, Kasuga 816-8580, Japan.*

*Fax: +81-092-583-7815; Tel.: +81-092-583-7815; E-mail:tsuji@cm.kyushu-u.ac.jp*

<sup>b</sup> *Department of Automotive Science, Graduate School of Integrated Frontier Sciences,  
Kyushu University, Kasuga, 816-8580, Japan*

<sup>c</sup> *Department of Applied Science for Electronics and Materials, Graduate School of Engineering  
Sciences, Kyushu University, Kasuga 816-8580, Japan*

<sup>d</sup> *Department of Biological and Environmental Chemistry, School of Humanity-oriented Science  
and Technology, Kinki University, Iizuka 820-8555, Japan*

<sup>e</sup> *Department of Mechanical and Control Engineering, Tokuyama College of Technology, Shunan  
745-8585, Japan*

(a) colorless and  
transparence

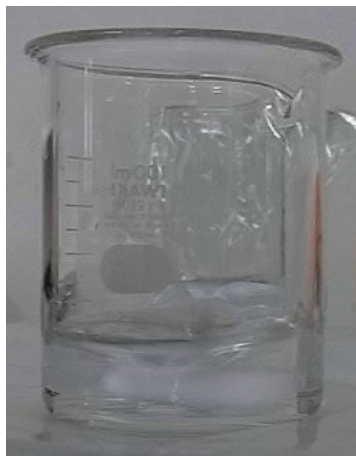

(b) yellow

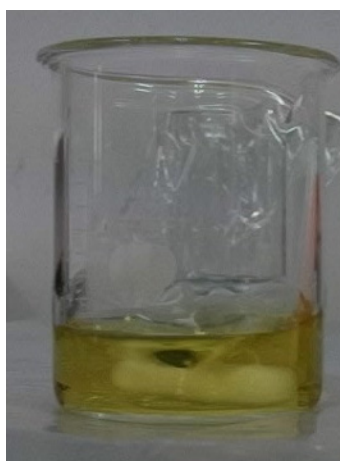

(c) orange

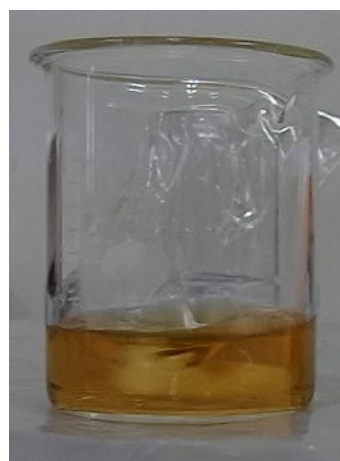

(d) red

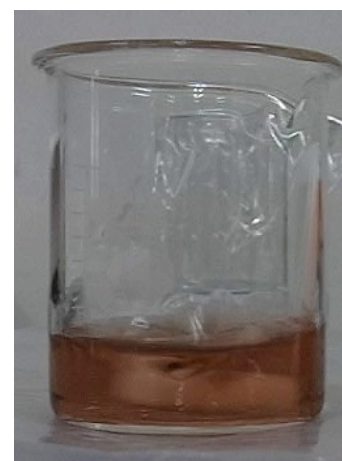

(e) violet

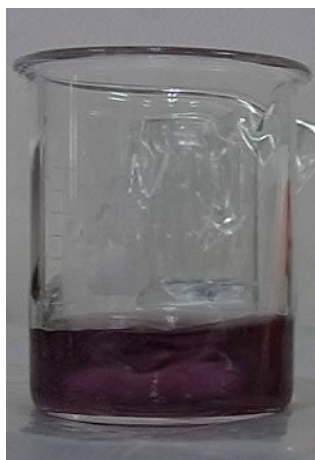

(f) bluish purple

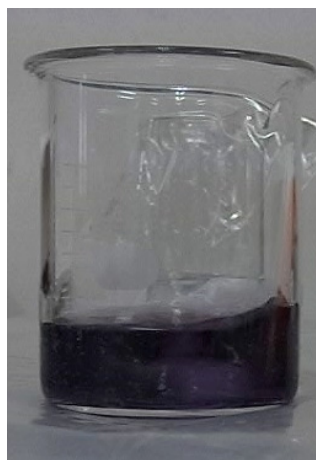

(g) blue

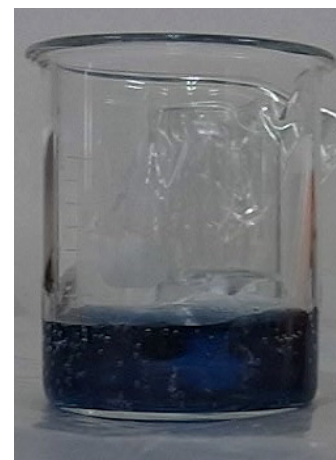

**Fig. S1.** Color changes of  $\text{HAuCl}_4 \cdot 4\text{H}_2\text{O}/\text{AgNO}_3/\text{NaBH}_4/\text{PVP}/\text{Na}_3\text{CA}/\text{H}_2\text{O}_2$  solution at Au/Ag molar ratio of 4% (a) before and (b)–(g) after addition of  $\text{NaBH}_4$ .

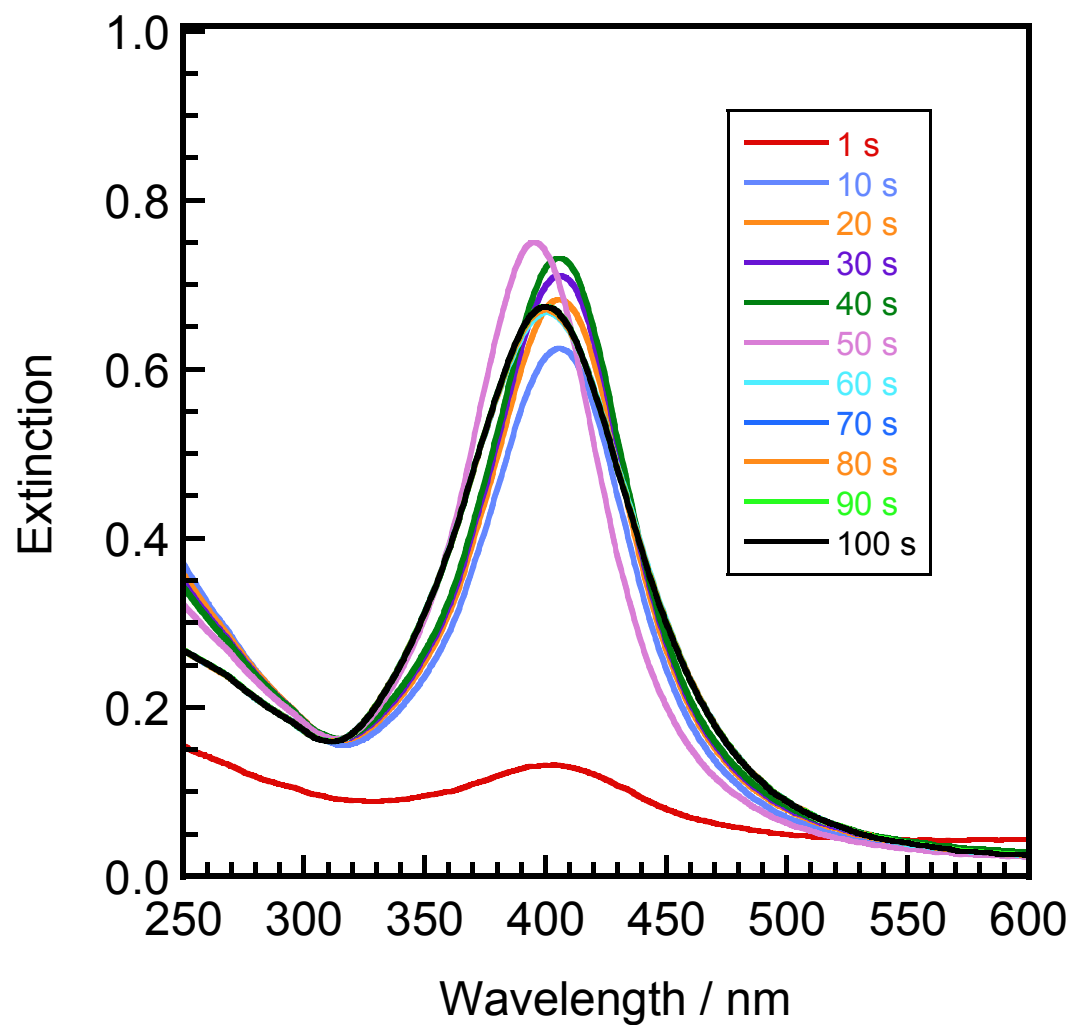

**Fig. S2.** UV-Vis spectra of products after addition of  $\text{NaBH}_4$  to  $\text{HAuCl}_4 \cdot 4\text{H}_2\text{O}/\text{AgNO}_3/\text{PVP}/\text{Na}_3\text{CA}$  solution at Au/Ag molar ratio of 4%.

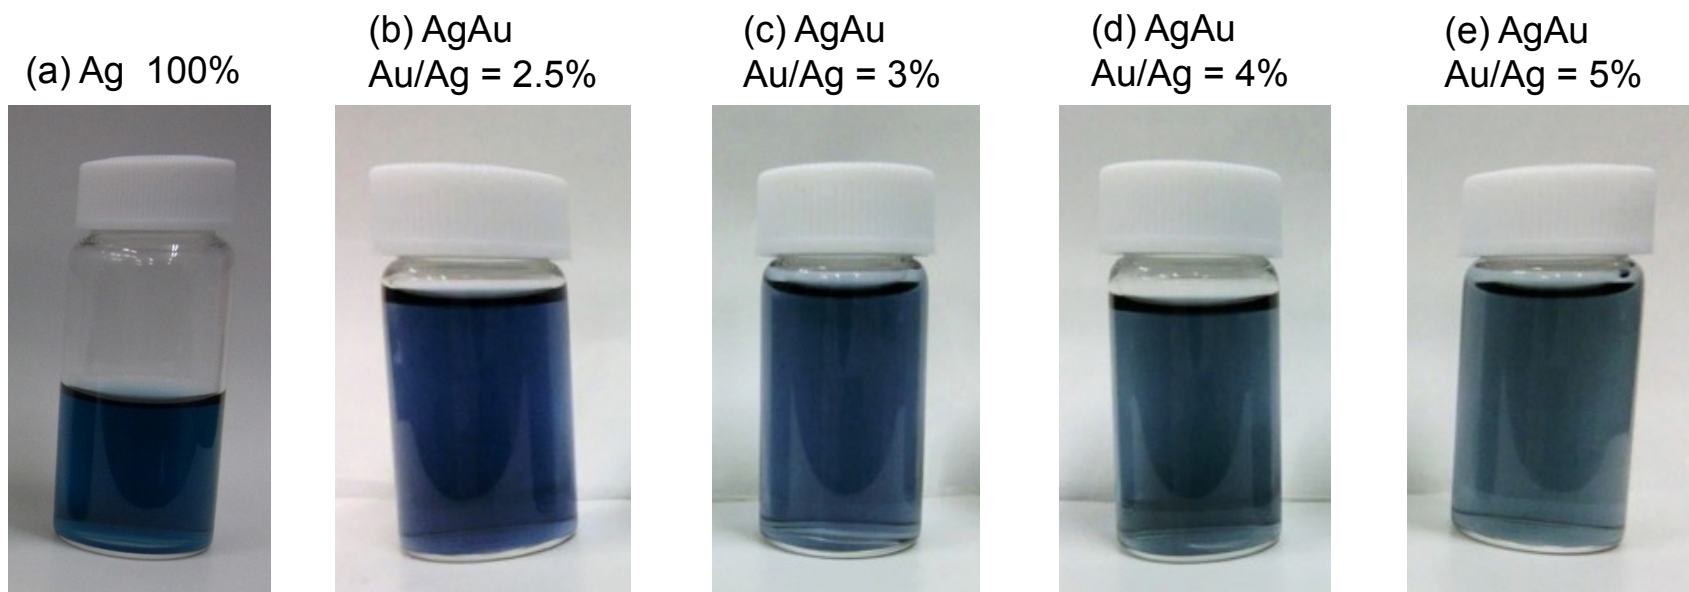

**Fig. S3.** Colors of product solutions of (a) Ag prisms obtained from  $\text{AgNO}_3/\text{NaBH}_4/\text{PVP}/\text{Na}_3\text{CA}/\text{H}_2\text{O}_2$  solution and (b)–(e) Ag-rich AgAu alloy prisms obtained from  $\text{HAuCl}_4 \cdot 4\text{H}_2\text{O}/\text{AgNO}_3/\text{NaBH}_4/\text{PVP}/\text{Na}_3\text{CA}/\text{H}_2\text{O}_2$  solution at Au/Ag molar ratios of 2.5–5%.

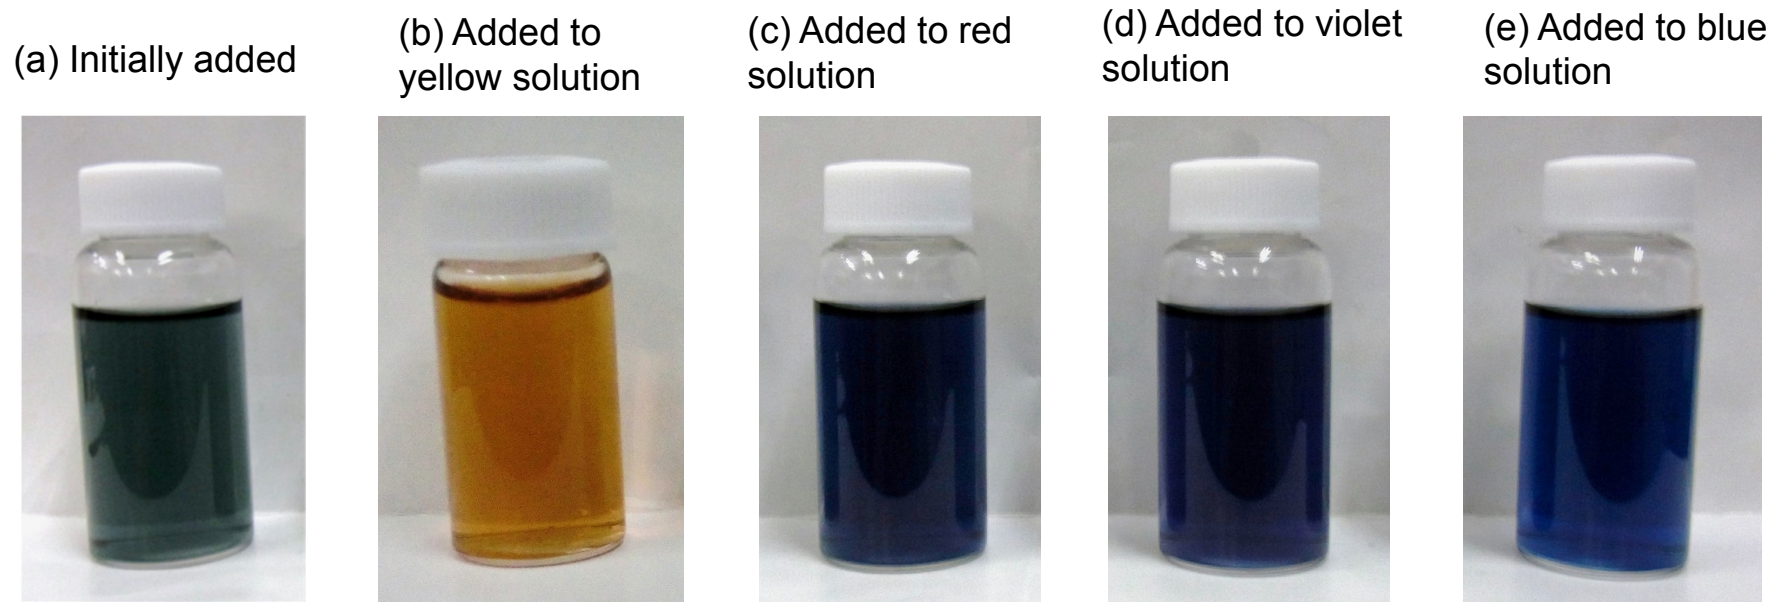

**Fig. S4.** Colors of product solutions obtained after various timing of addition of  $\text{HAuCl}_4 \cdot 4\text{H}_2\text{O}$  to  $\text{AgNO}_3/\text{NaBH}_4/\text{PVP}/\text{Na}_3\text{CA}/\text{H}_2\text{O}_2$  solution at Au/Ag molar ratio of 4%.

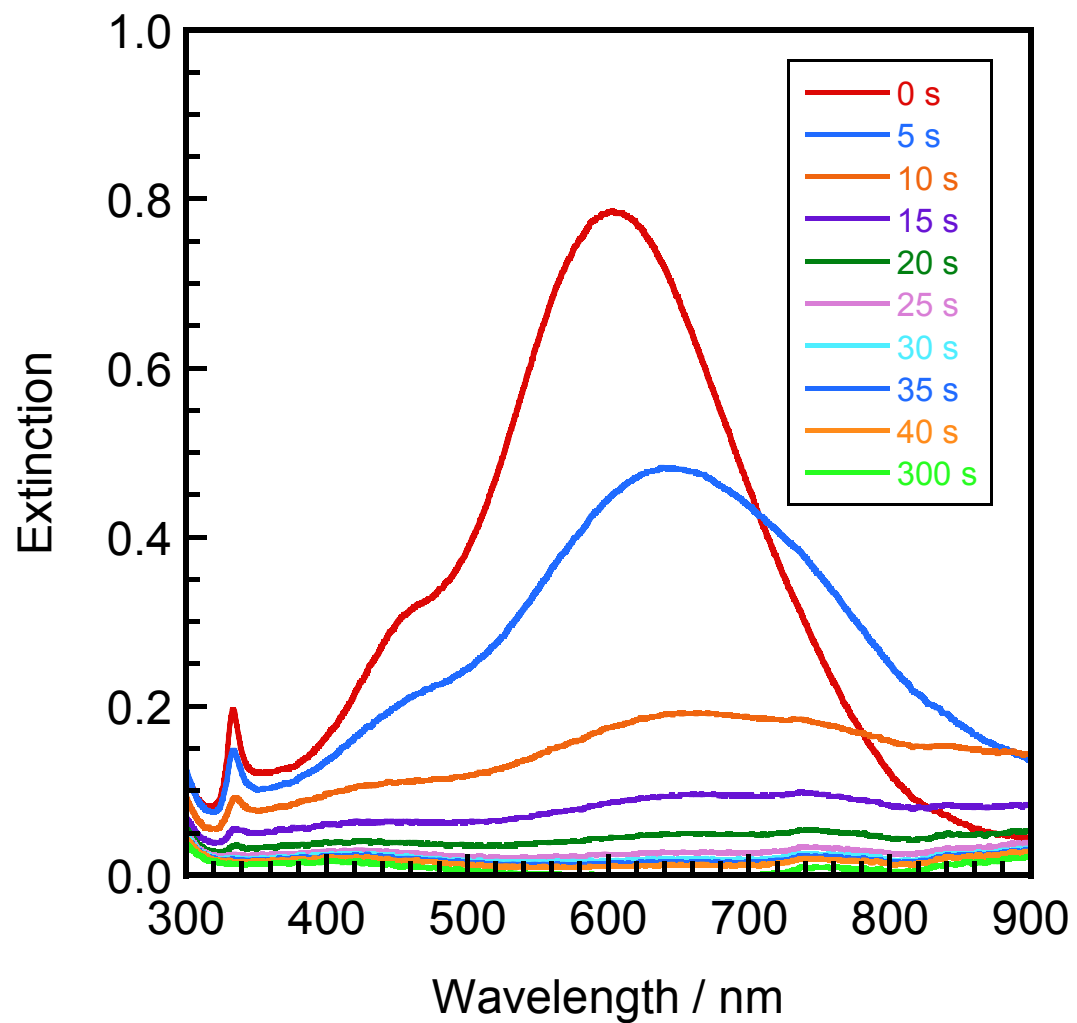

**Fig. 5.** UV-Vis spectra of Ag-rich AgAu prisms after addition of H<sub>2</sub>O<sub>2</sub>. AgAu prisms were prepared at Au/Ag molar ratio of 4%. The concentration of H<sub>2</sub>O<sub>2</sub> after addition was 7.0 mM.
